# Supplementary material
Source: PubMed Central journal article supplement (PMC7225560)
Supplement: MCB.00663-19-s0006.pdf [file MCB.00663-19-s0006.pdf]

## **Supplementary Tables**

Table\_S1 bHLH factors expressed in E 9.5 mouse head

Table\_S2 Analysis of mass-spectrometry data

Table\_S3 Dimer DEG and Gene-set analysis

Table\_S4 Gene-set analysis T12 vs TT cell lines

Table\_S5 Primers and Plasmids
